# Supplementary material for: Clinical proteomic analysis of scrub typhus infection
Source: PubMed Central journal article supplement (PMC5812041; doi:10.1186/s12014-018-9181-5), 2018-02-14
Supplement: 12014_2018_9181_MOESM1_ESM.pdf [file 12014_2018_9181_MOESM1_ESM.pdf]

## Additional file 1: Fig. S1

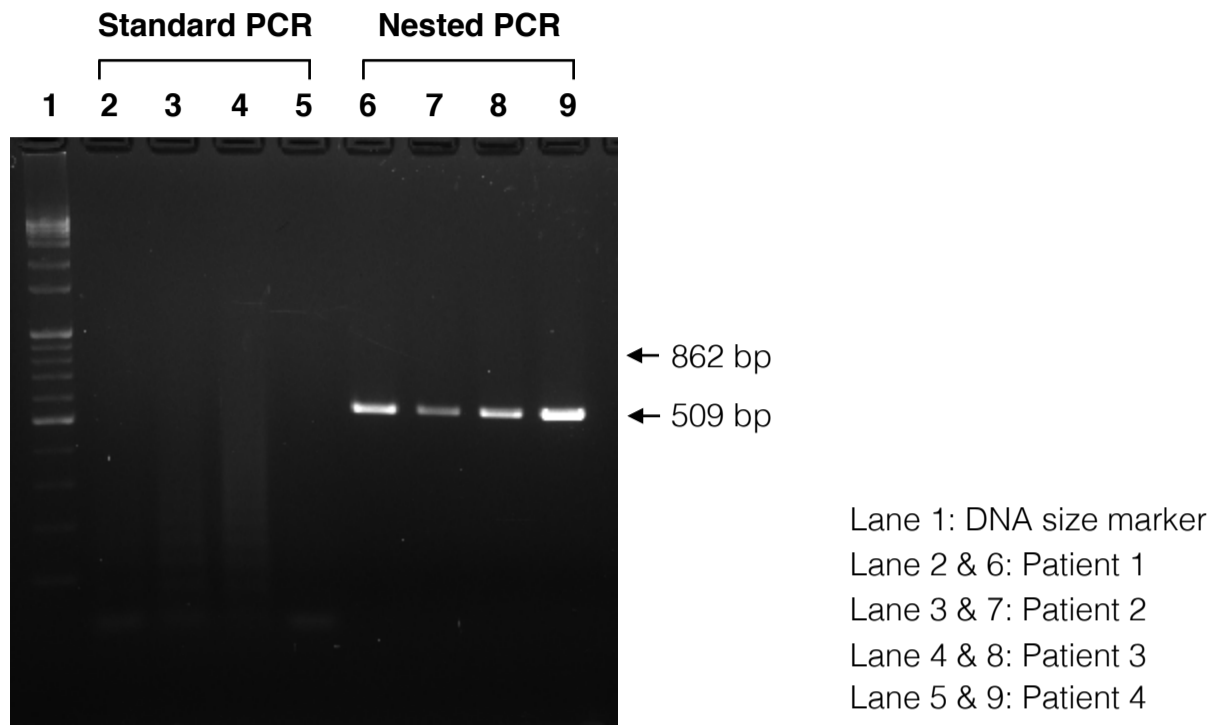

**Figure S1.** Nested PCR of 56 kDa gene confirmed the infection of *O. tsutsugamushi* in scrub typhus patients. Clinical samples of patient 1, 2, and 4 were used for proteomic analysis.

# Additional file 1: Fig. S2

## A (Normal subjects)

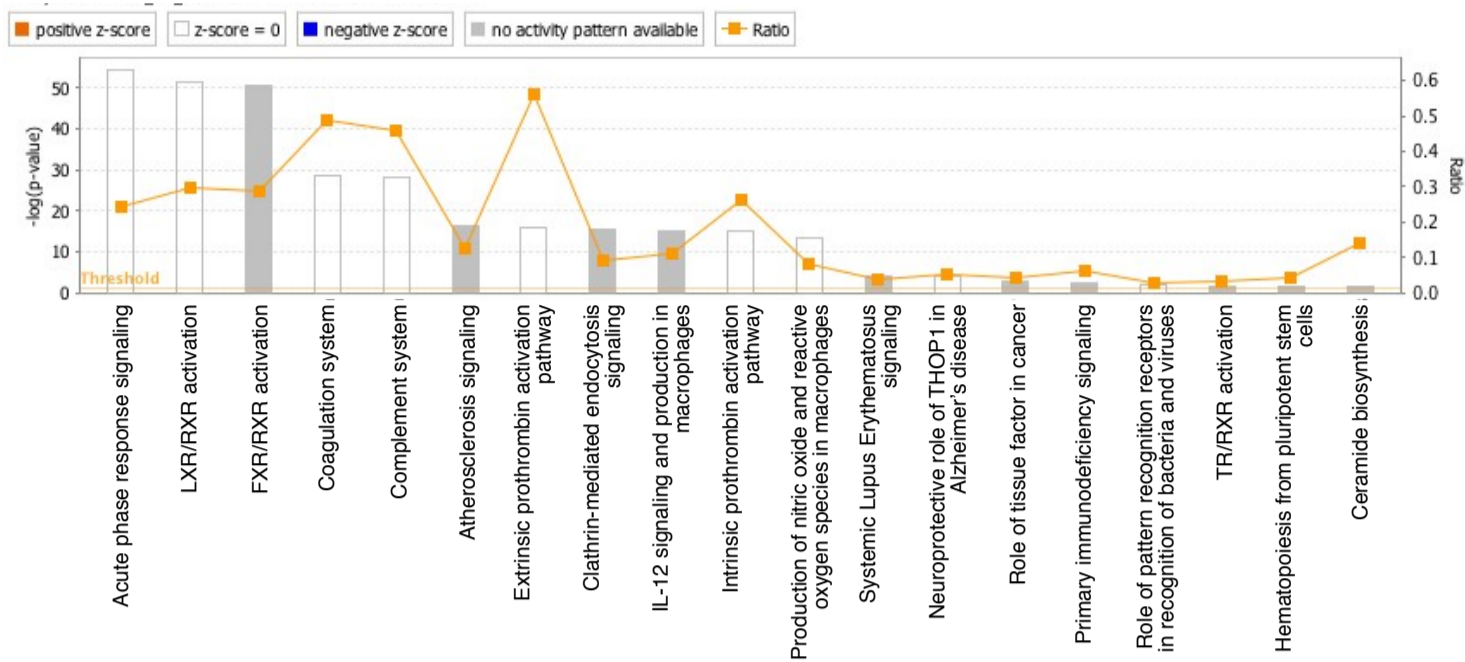

## B (Naive patient)

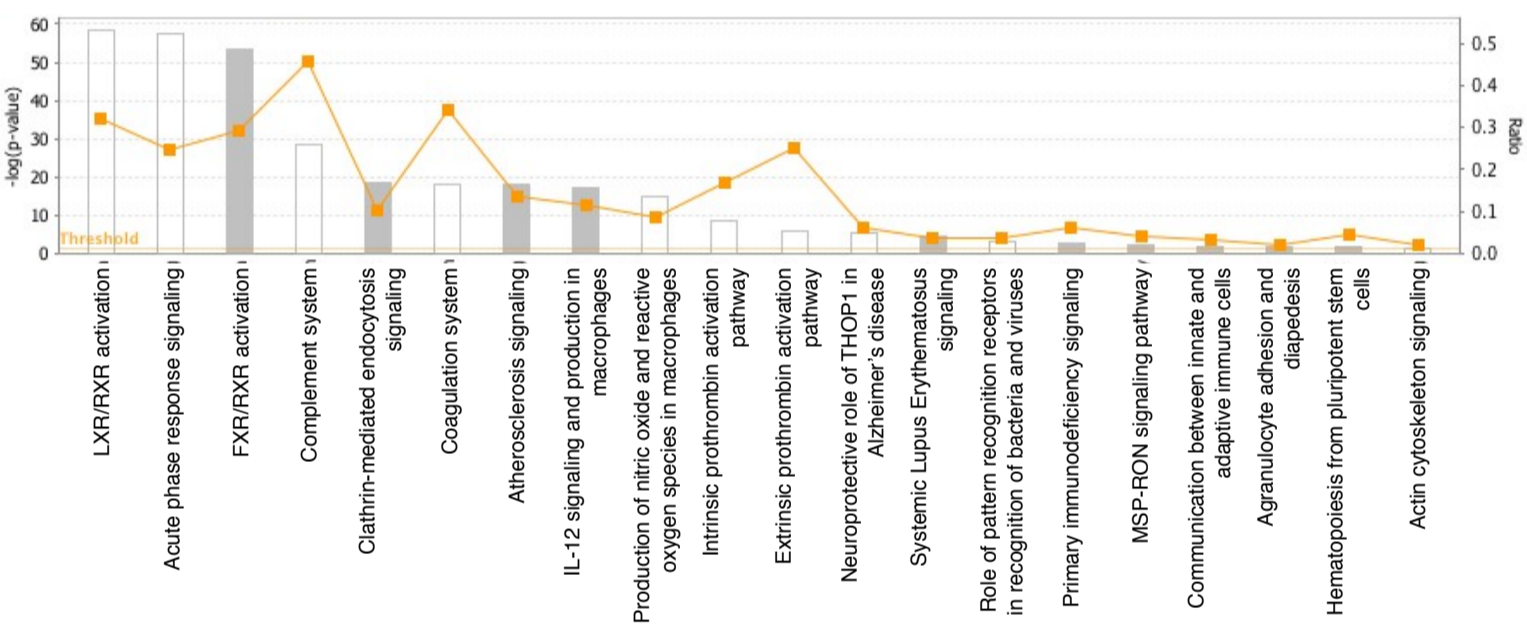

## C (Treated patient)

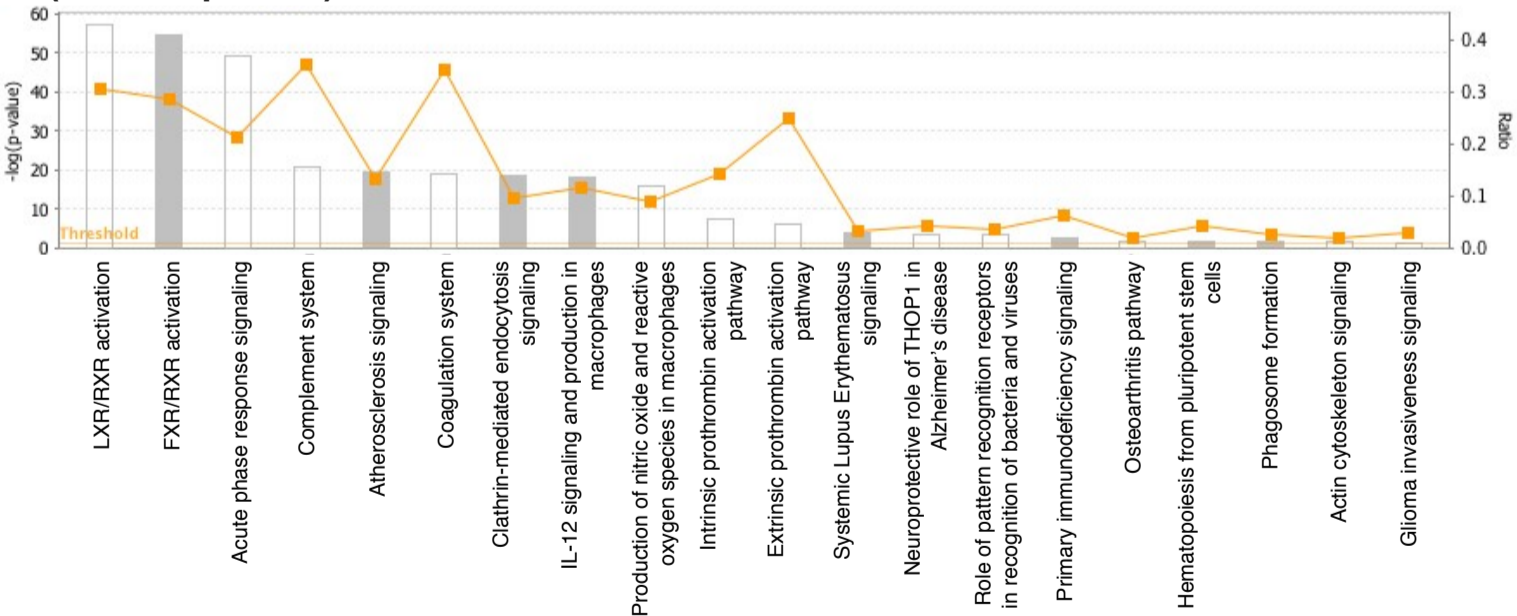

**Figure S2.** Functional annotation of the proteins identified in normal subjects (A), naive scrub typhus patients (B), and treated patients (C).
